# Supplementary material for: Temperature and Diet Acclimation Modify the Acute Thermal Performance of the Largest Extant Amphibian
Source: MDPI journal article supplement (doi:10.3390/ani12040531), 2022-02-21
Supplement: s1 [file s1]

**Table S1.** Influences of temperature and diet acclimation on growth rate. The differences between groups were analyzed with two-way ANOVA.

| Factors                 | Type III Sum of square | df | Mean square | F value | Sig.         |
|-------------------------|------------------------|----|-------------|---------|--------------|
| Diet                    | 5.894                  | 1  | 5.894       | 40.676  | <b>0.000</b> |
| Acclimation temperature | 5.899                  | 2  | 2.950       | 20.356  | <b>0.000</b> |
| Interaction             | 1.649                  | 2  | 0.825       | 5.692   | <b>0.005</b> |

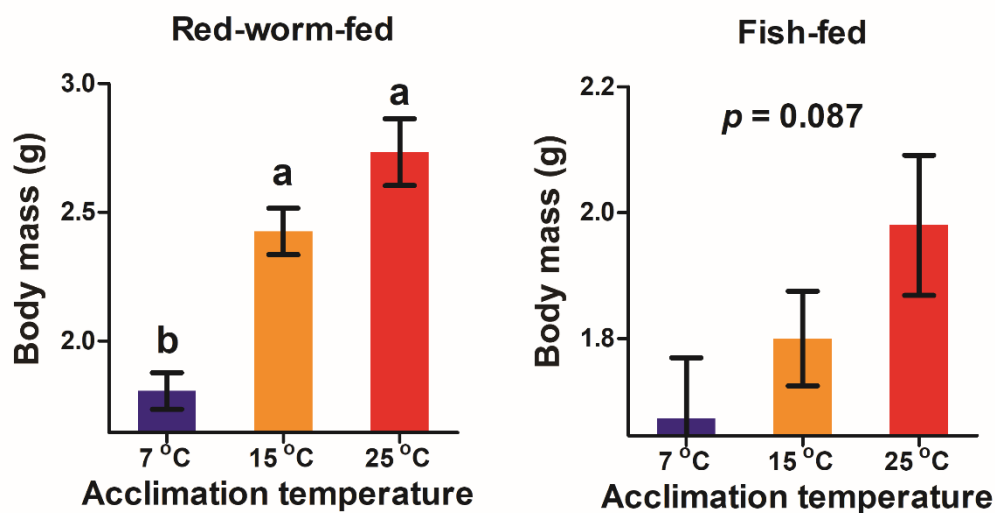

**Figure S1.** Body weight at the end of acclimation program. The horizontal axis denotes the initial body weight before acclimation. Different letters denote significant differences between groups, and the data was analyzed by two-way ANOVA and simple effect test.
